# Supplementary material for: Studying Autism Using Untargeted Metabolomics in Newborn Screening Samples
Source: PubMed Central journal article supplement (PMC8233278; doi:10.1007/s12031-020-01787-2), 2021-01-30
Supplement: 12031_2020_1787_MOESM3_ESM.pdf [file 12031_2020_1787_MOESM3_ESM.pdf]

Search name:

20190718\_Autism\_UNPaired\_v2.6\_NoNorm\_noGF\_7sc\_allAdd\_mzCLO\_DBs\_RT\_0.1min\_1E5\_0.1min\_DBS

Search description: Untargeted Metabolomics workflow: Retention time alignment, Component Detection, Grouping, Elemental Composition Prediction, Gap Filling, Hide chemical Background (using blanks), ID using mzCloud (needs MS/MS) and ChemSpider (using Formula); KEGG Pathway Mapping and Differential Analysis (ANOVA, adjusted p-values, fold change, CV, etc.)

Search date: 18-07-2019 18:15:51

Created with Discoverer version: 2.1.0.401

[Input Files (6)]

-->Select Spectra (7)

[Select Spectra (7)]

-->Align Retention Times (10)

-->Create Mass Trace (28)

[Align Retention Times (10)]

-->Detect Unknown Compounds (9)

[Detect Unknown Compounds (9)]

-->Group Unknown Compounds (8)

[Group Unknown Compounds (8)]

-->Search mzCloud (22)

-->Predict Compositions (16)

-->Search ChemSpider (23)

-->Search Mass Lists (27)

-->Mark Background Compounds (20)

[Predict Compositions (16)]

-->Search ChemSpider (23)

[Search mzCloud (22)]

[Search ChemSpider (23)]

[Search Mass Lists (27)]

[Mark Background Compounds (20)]

[Create Mass Trace (28)]

[Differential Analysis (17)]

[Descriptive Statistics (24)]

[Assign Compound Annotations (29)]

---

Processing node 6: Input Files

---

Input Data:

- File Name(s) (Hidden):

---

Processing node 7: Select Spectra

---

1. General Settings:

- Precursor Selection: Use MS(n - 1) Precursor
- Use New Precursor Reevaluation: True
- Use Isotope Pattern in Precursor Reevaluation: True
- Store Chromatograms: False

2. Spectrum Properties Filter:

- Lower RT Limit: 0
- Upper RT Limit: 15
- First Scan: 0
- Last Scan: 0
- Ignore Specified Scans: (not specified)
- Lowest Charge State: 1
- Highest Charge State: 3
- Min. Precursor Mass: 70 Da
- Max. Precursor Mass: 1050 Da
- Total Intensity Threshold: 500000
- Minimum Peak Count: 1

3. Scan Event Filters:

- Mass Analyzer: Is FTMS
- MS Order: Any
- Activation Type: Is HCD
- Min. Collision Energy: 0
- Max. Collision Energy: 1000
- Scan Type: Any
- Polarity Mode: Is +

4. Peak Filters:

- S/N Threshold (FT-only): 3

5. Replacements for Unrecognized Properties:

- Unrecognized Charge Replacements: 1
- Unrecognized Mass Analyzer Replacements: FTMS
- Unrecognized MS Order Replacements: MS2
- Unrecognized Activation Type Replacements: HCD
- Unrecognized Polarity Replacements: +
- Unrecognized MS Resolution@200 Replacements: 75000
- Unrecognized MSn Resolution@200 Replacements: 17500

---

Processing node 10: Align Retention Times

---

1. General Settings:

- Alignment Model: Adaptive curve
- Alignment Fallback: Use Linear Model
- Maximum Shift [min]: 0.1
- Shift Reference File: True
- Mass Tolerance: 5 ppm
- Remove Outlier: True

-----  
Processing node 9: Detect Unknown Compounds  
-----

## 1. General Settings:

- Mass Tolerance [ppm]: 5 ppm
- Intensity Tolerance [%]: 30
- S/N Threshold: 2
- Min. Peak Intensity: 100000
- Ions:

[2M+ACN+H]+1  
[2M+ACN+Na]+1  
[2M+FA-H]-1  
[2M+H]+1  
[2M+K]+1  
[2M+Na]+1  
[2M+NH4]+1  
[2M-H]-1  
[2M-H+HAc]-1  
[M+2H]+2  
[M+3H]+3  
[M+ACN+2H]+2  
[M+ACN+H]+1  
[M+ACN+Na]+1  
[M+Cl]-1  
[M+DMSO+H]+1  
[M+FA-H]-1  
[M+H]+1  
[M+H+K]+2  
[M+H+MeOH]+1  
[M+H+Na]+2  
[M+H+NH4]+2  
[M+H-H2O]+1  
[M+H-NH3]+1  
[M+K]+1  
[M+Na]+1  
[M+NH4]+1  
[M-2H]-2  
[M-2H+K]-1  
[M-H]-1  
[M-H+HAc]-1  
[M-H+TFA]-1  
[M-H-H2O]-1

- Base Ions: [M+H]+1; [M-H]-1
- Min. Element Counts: C H
- Max. Element Counts: C90 H190 Br3 Cl4 K2 N10 Na2 O15 P2 S5

## 2. Peak Detection:

- Filter Peaks: True
- Max. Peak Width [min]: 0.5
- Remove Singlets: True
- Min. # Scans per Peak: 7
- Min. # Isotopes: 2

---

Processing node 8: Group Unknown Compounds

---

1. Compound Consolidation:

- Mass Tolerance: 5 ppm
- RT Tolerance [min]: 0.1

2. Fragment Data Selection:

- Preferred Ions: [M+H]<sup>+</sup>+1; [M-H]<sup>-</sup>-1
- 

Processing node 22: Search mzCloud

---

1. Search Settings:

- Compound Classes: All
  - Match Ion Activation Type: True
  - Match Ion Activation Energy: Any
  - Ion Activation Energy Tolerance: 100
  - Apply Intensity Threshold: False
  - Precursor Mass Tolerance: 5 ppm
  - FT Fragment Mass Tolerance: 10 ppm
  - IT Fragment Mass Tolerance: 0.1 Da
  - Identity Search: HighChem HighRes
  - Similarity Search: Similarity Forward
  - Library: Reference
  - Post Processing: Recalibrated
  - Match Factor Threshold: 0
  - Max. # Results: 20
- 

Processing node 16: Predict Compositions

---

1. Prediction Settings:

- Mass Tolerance: 5 ppm
- Min. Element Counts: C H
- Max. Element Counts: C90 H190 Br3 Cl4 N10 O15 P2 S5
- Min. RDBE: -1
- Max. RDBE: 40
- Min. H/C: 0.1
- Max. H/C: 3
- Max. # Candidates: 10
- Max. # Internal Candidates: 500

2. Pattern Matching:

- Intensity Tolerance [%]: 30
- Intensity Threshold [%]: 0.1
- S/N Threshold: 3
- Min. Spectral Fit [%]: 10
- Min. Pattern Cov. [%]: 90
- Use Dynamic Recalibration: True

3. Fragments Matching:

- Use Fragments Matching: True
- Mass Tolerance: 5 ppm
- S/N Threshold: 3

---

Processing node 23: Search ChemSpider

---

1. Search Settings:

- Mass Tolerance: 5 ppm
- Database(s):
  - BioCyc
  - Cayman Chemical
  - ChEBI
  - FDA UNII - NLM
  - Human Metabolome Database
  - KEGG
  - LipidMAPS
  - MCISB
  - SMPDB Small Molecule Pathway Database
- Max. # of results per compound: 100
- Max. # of Predicted Compositions to be searched per Compound: 5
- Result Order (for Max. # of results per compound): Order By Reference Count (DESC)

2. Predicted Composition Annotation:

- Check All Predicted Compositions: False

---

Processing node 27: Search Mass Lists

---

1. Search Settings:

- Input file(s): IEM\_4400\_AAAC\_database\_V2.0.csv
- Mass Tolerance: 5 ppm
- Show extra Fields as Columns: True
- Consider Retention Time: True
- RT Tolerance : 1

---

Processing node 20: Mark Background Compounds

---

1. General Settings:

- Max. Sample/Blank: 5
- Max. Blank/Sample: 0
- Hide Background: True

---

Processing node 28: Create Mass Trace

---

1. General Settings:

- Trace Type: TIC
- MS Order: MS1
- Polarity: +
- Custom Label: (not specified)

2. XIC Settings:

- Mass [Da]: 0
- Mass Tolerance: 5 ppm

-----  
Processing node 17: Differential Analysis  
-----

1. General Settings:

- Log10 Transform Values: True

-----  
Processing node 24: Descriptive Statistics  
-----

No parameters

-----  
Processing node 29: Assign Compound Annotations  
-----

1. General Settings:

- Mass Tolerance: 5 ppm

2. Data Sources:

- Data Source #1: mzCloud Search
- Data Source #2: (not specified)
- Data Source #3: (not specified)
- Data Source #4: (not specified)
