# Supplementary material for: Studying Autism Using Untargeted Metabolomics in Newborn Screening Samples
Source: PubMed Central journal article supplement (PMC8233278; doi:10.1007/s12031-020-01787-2), 2021-01-30

## Targeted Analysis of labeled internal standards

### Six outliers (blue) versus average intensities for cases and controls

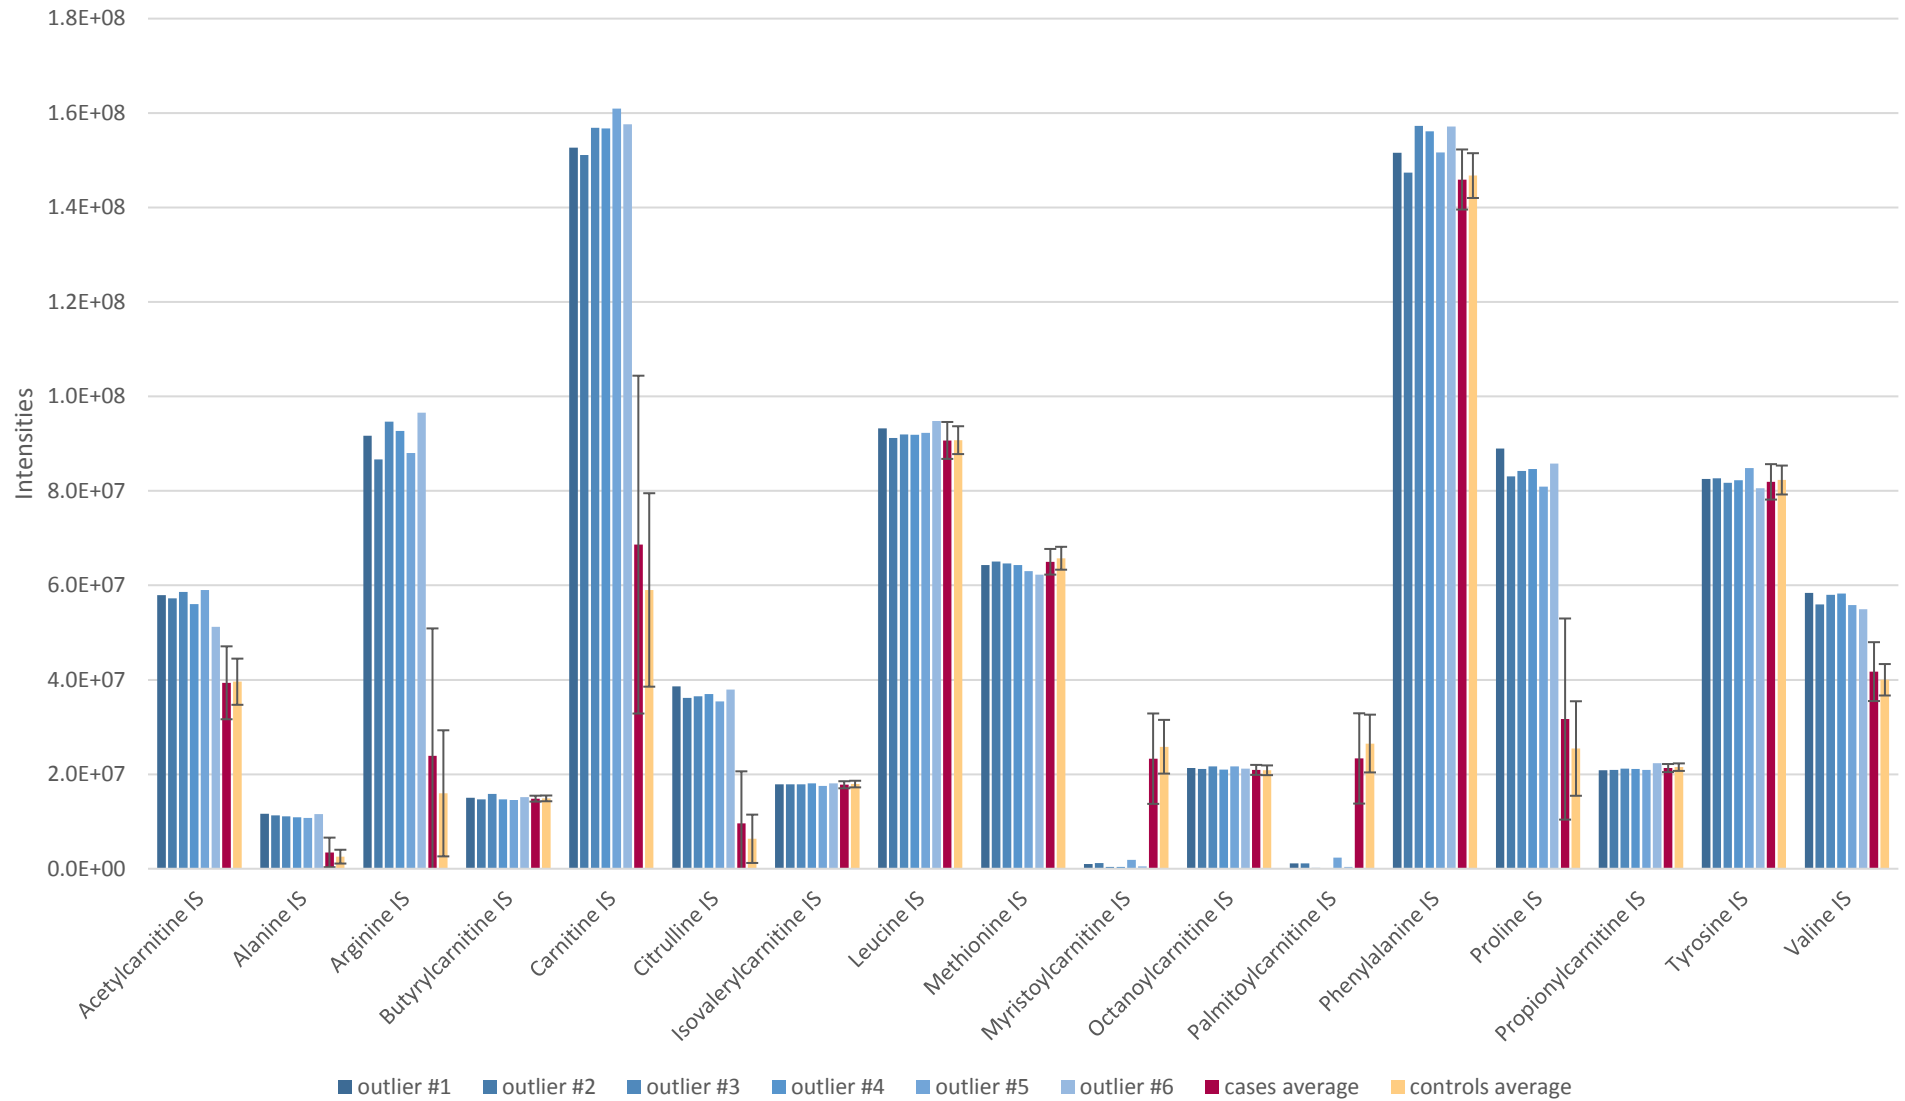

## Targeted Analysis of unlabeled homologs of internal standards Six outliers (blue) versus average intensities for cases and controls

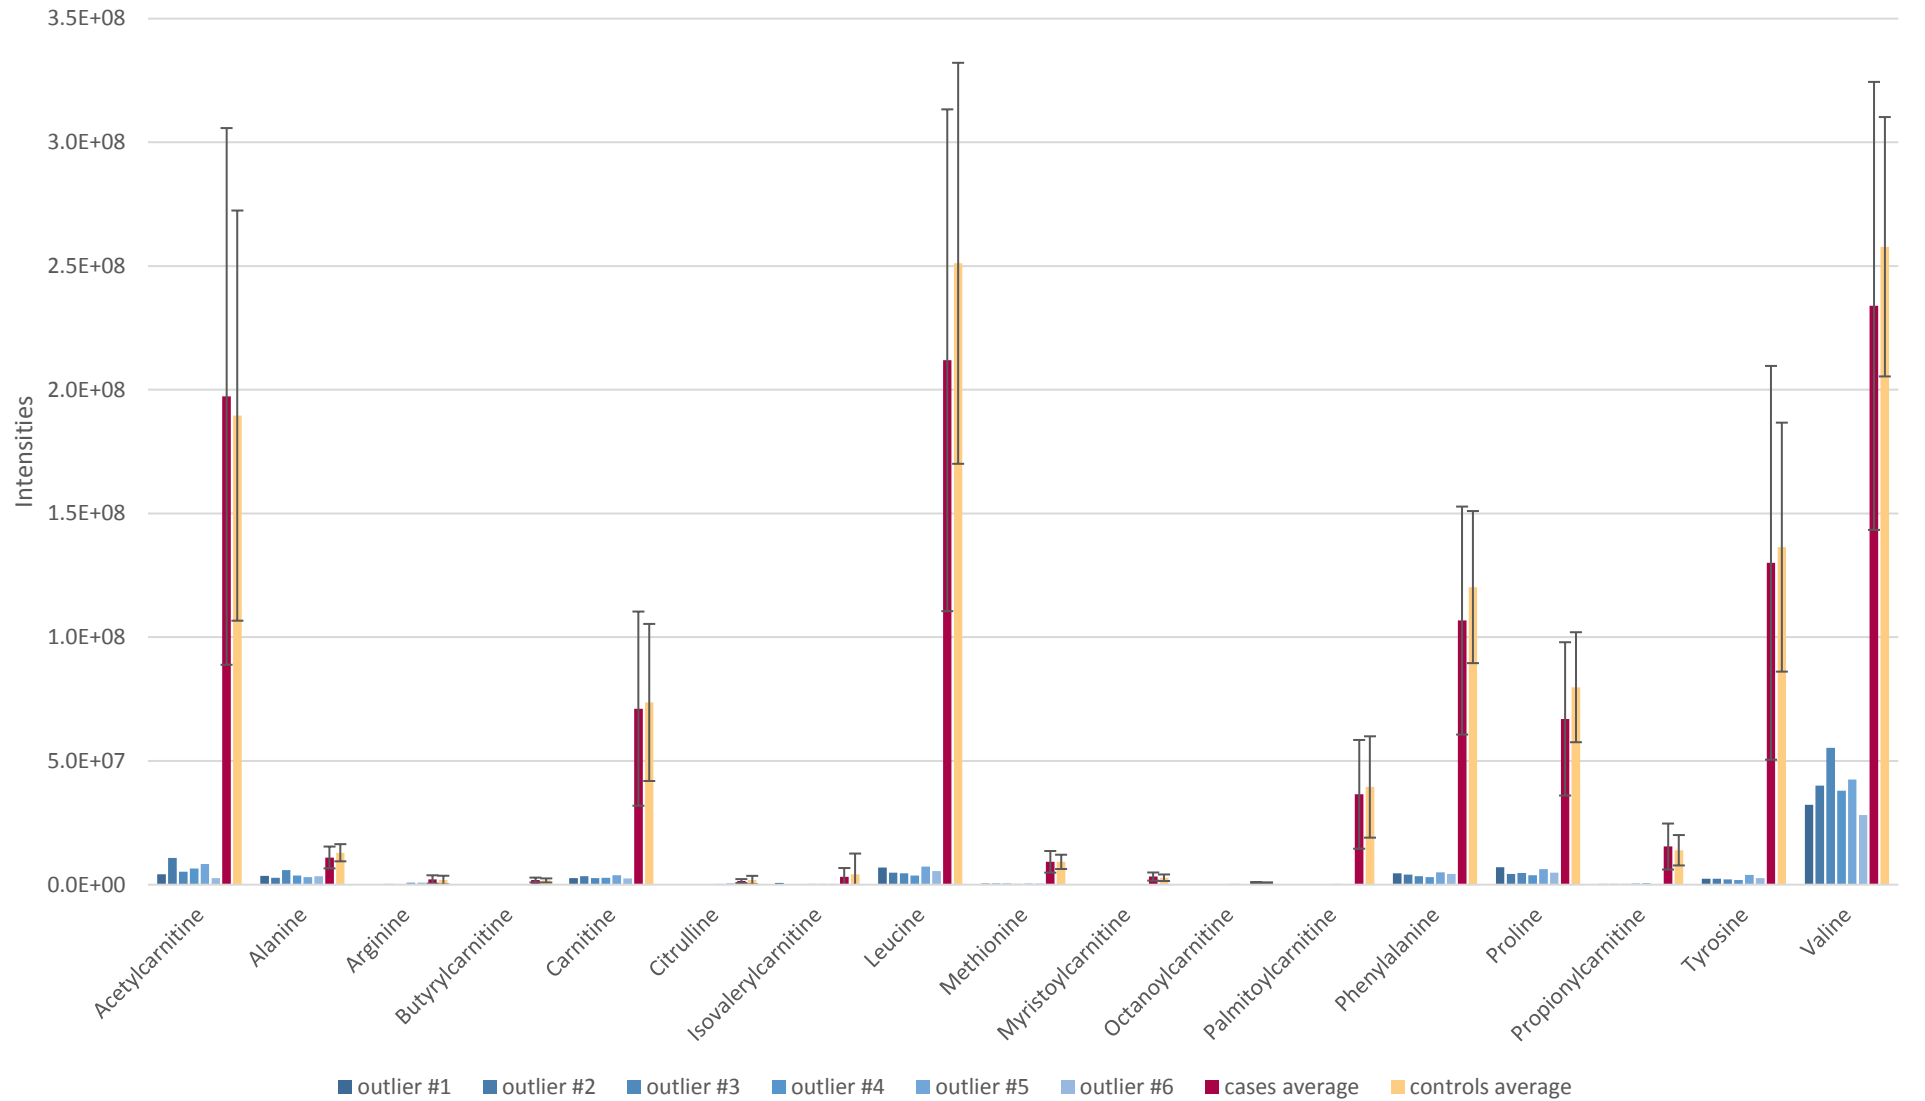

# Heatmap of untargeted analysis features intensities generated using MetaboAnalyst 4.0

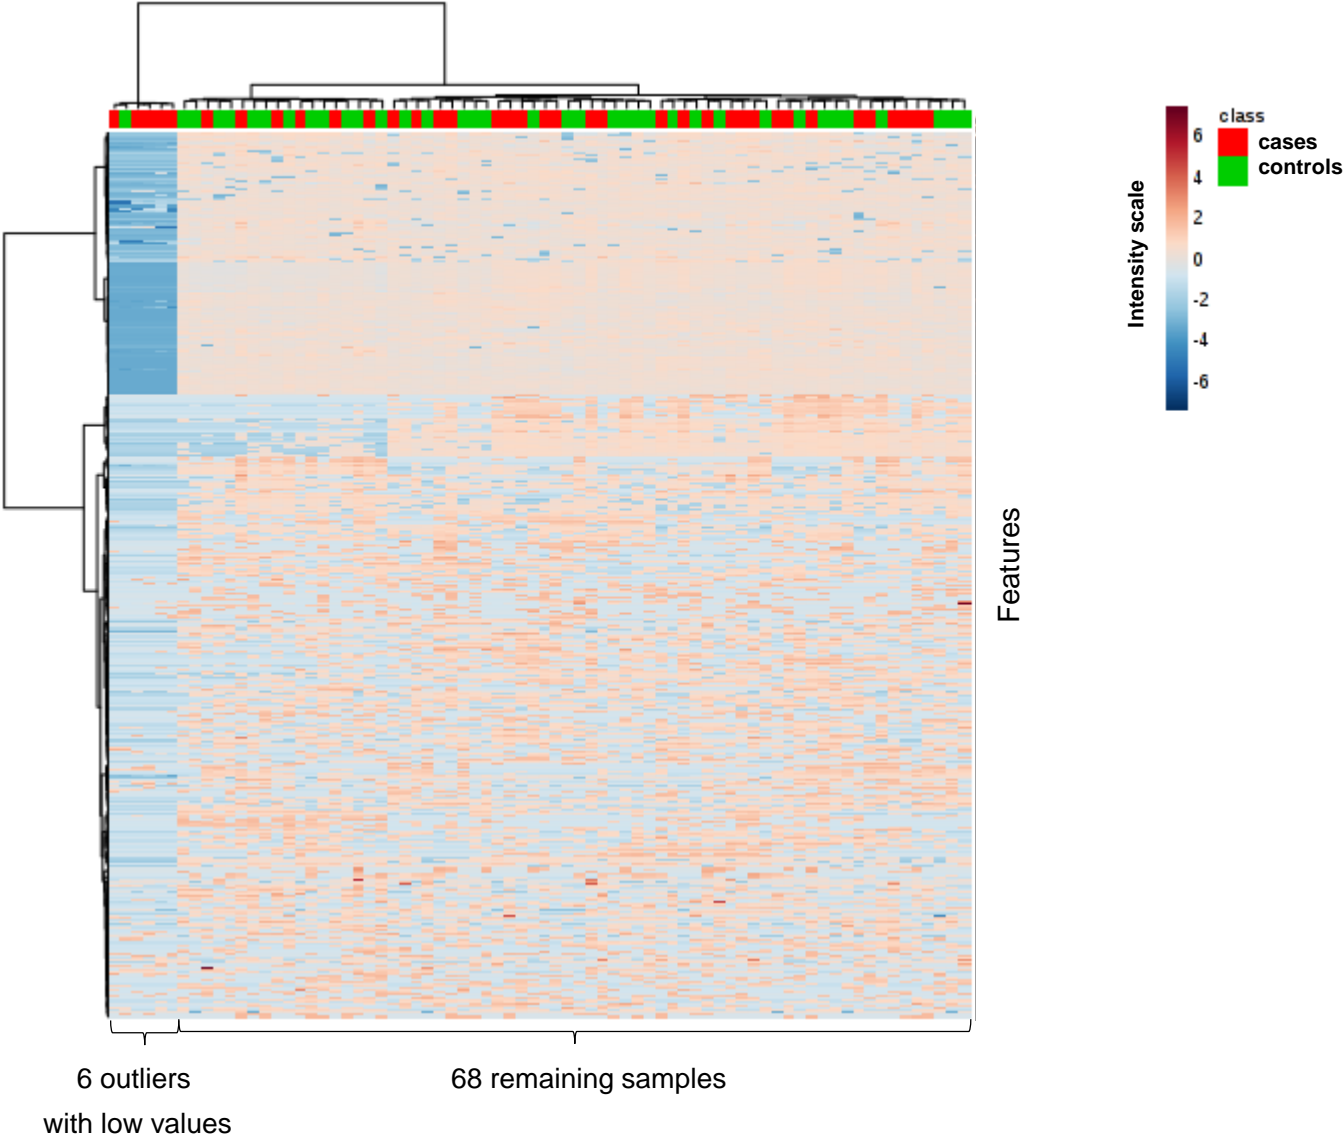

Supplement: 12031_2020_1787_MOESM4_ESM.pdf [file 12031_2020_1787_MOESM4_ESM.pdf]
